# Supplementary material for: Repopulating hematopoietic stem cells from steady-state blood before and after ex vivo culture are enriched in the CD34+CD133+CXCR4low fraction
Source: PubMed Central journal article supplement — Haematologica. 2018 Jun 1;103(10):1604–15. doi: 10.3324/haematol.2017.183962 (PMC6165804; doi:10.3324/haematol.2017.183962), 2018-10
Supplement: 2017_183962-Disclosures_and_Contributions.pdf [file 2017_183962-Disclosures_and_Contributions.pdf]

Haematologica  
HAEMATOL/2017/183962  
Version 3

Repopulating hematopoietic stem cells from steady-state blood before and after ex vivo culture are enriched in CD34+CD133+CXCR4low fraction.

Véronique Lapostolle, Jean Chevaleyre, Pascale Duchez, Laura Rodriguez, Marija Vlaski-Lafarge, Ioanna Sandvig, Philippe Brunet de la Grange, and Zoran Ivanovic

Disclosures: 1. This manuscript was funded by an EFS (French Blood Institute - Etablissement Français du Sang) Grant (N° 2016-01-IVANOVIC-AQLI) and French Biomedical Agency (Agence de la Biomédecine) Grant (AOR “Grefte” 2015). Ioanna Sandvig was supported by the Liaison Committee between the Central Norway Health Authority (RHA) and the Norwegian University of Science and Technology (NTNU).

Contributions: VL, JC, PD, LR, MVL, PBG and ZI participated in experimental work. The manuscript was written by VL, ZI and IS. Concept, projects (including the grant applications) and project management: ZI.
